# Supplementary material for: Conversion of lignin pyrolysis oil to cyclohexyl methyl ethers as a promising biomass-derived solvent
Source: Royal Society of Chemistry journal article supplement (doi:10.1039/d0gc04215c), 2021-01-01
Supplement: d0gc04215c1.pdf [file d0gc04215c1.pdf]

## Electronic Supplementary Information (ESI)

### **Conversion of lignin pyrolysis oil to cyclohexyl methyl ethers for use as biomass-derived solvents**

Sohaib Haseeb, Jesse R. Vanderveen, Devni Elamaldeniya, Jesse Harris, Kyle J. Boniface, Roland Lee, Pascale Champagne and Philip G. Jessop

#### **Table of contents**

|                                                       |    |
|-------------------------------------------------------|----|
| Methylation of model compounds .....                  | S2 |
| Composition of the methylated and rectified LPO ..... | S2 |
| NMR spectra .....                                     | S3 |
| IR spectra .....                                      | S5 |

**Table S1.** Methylation of model compounds<sup>a</sup>

| Entry | Compound <sup>b</sup> | DMC (ml) | DBU (g) | Time (h) | % yield of pure product <sup>c</sup> |
|-------|-----------------------|----------|---------|----------|--------------------------------------|
| 1     | Phenol                | 2.5      | 0.5     | 24       | -                                    |
| 2     | Phenol                | 5        | 1.25    | 24       | 53                                   |
| 3     | Guaiacol              | 5        | 1.25    | 24       | 85                                   |
| 4     | 4-methyl catechol     | 2.5      | 1.25    | 17       | 96                                   |
| 5     | Eugenol               | 5        | 1.25    | 17       | 95                                   |

<sup>a</sup>Temperature = 120 °C

<sup>b</sup>1 g of a model compound was used for each reaction

<sup>c</sup>Methylation was completed for all entries except entry 1

## Composition of LOME

**Table S2.** The approximate percent composition of LOME<sup>a</sup>

| Compound            | % of peak area |
|---------------------|----------------|
| 4-methylveratrole   | 38             |
| Veratrole           | 20             |
| 4-ethyl veratrole   | 11             |
| 3-methyl veratrole  | 5              |
| 2,3-dimethylanisole | 4              |
| 4-allylveratrole    | 2              |
| Unidentified        | 20             |

<sup>a</sup>The mixture composition is approximated by the peak areas on the total ion count chromatogram.

## NMR spectra

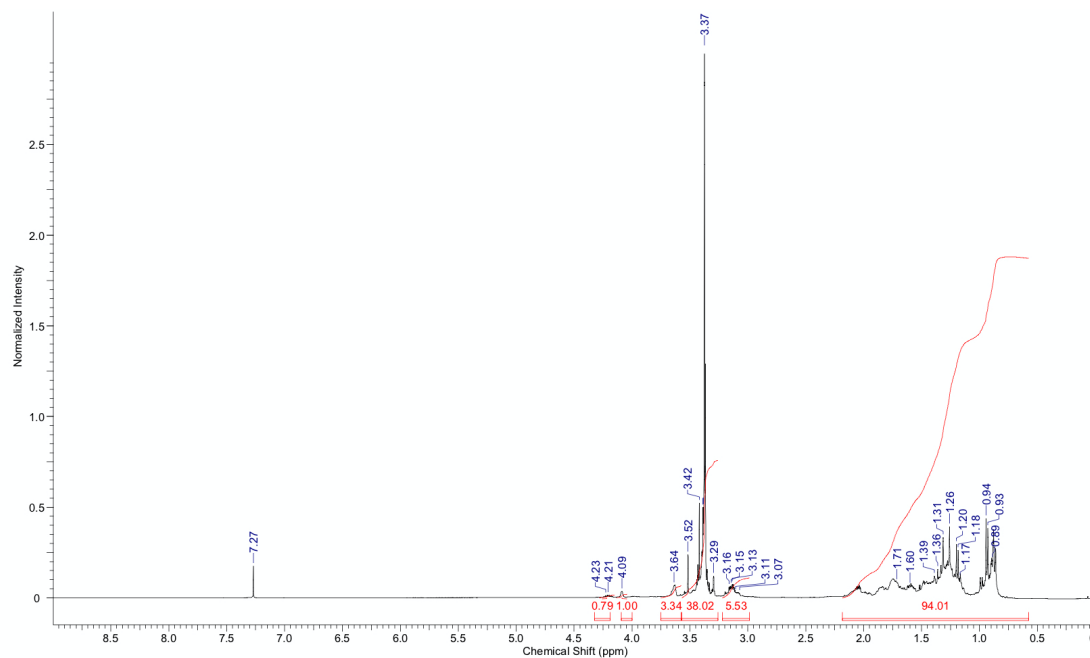

**Figure S1.** The  $^1\text{H}$  NMR spectrum of methylated, rectified and hydrogenated LPO mixture (HLOME) in  $\text{CDCl}_3$ . The peak at 7.27 ppm corresponds to residual  $\text{CHCl}_3$  in the  $\text{CDCl}_3$  solvent.

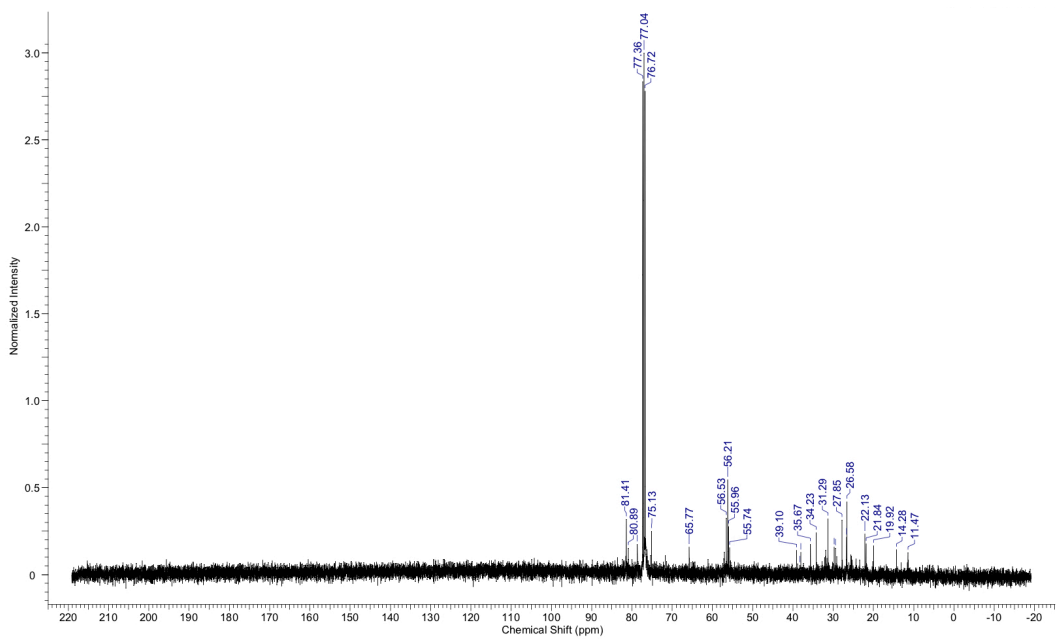

**Figure S2.** The  $^{13}\text{C}$  NMR spectrum of methylated, rectified and hydrogenated LPO mixture (HLOME) in  $\text{CDCl}_3$ . The peaks at 76.72, 77.04, and 77.36 ppm correspond to the  $\text{CDCl}_3$  solvent.

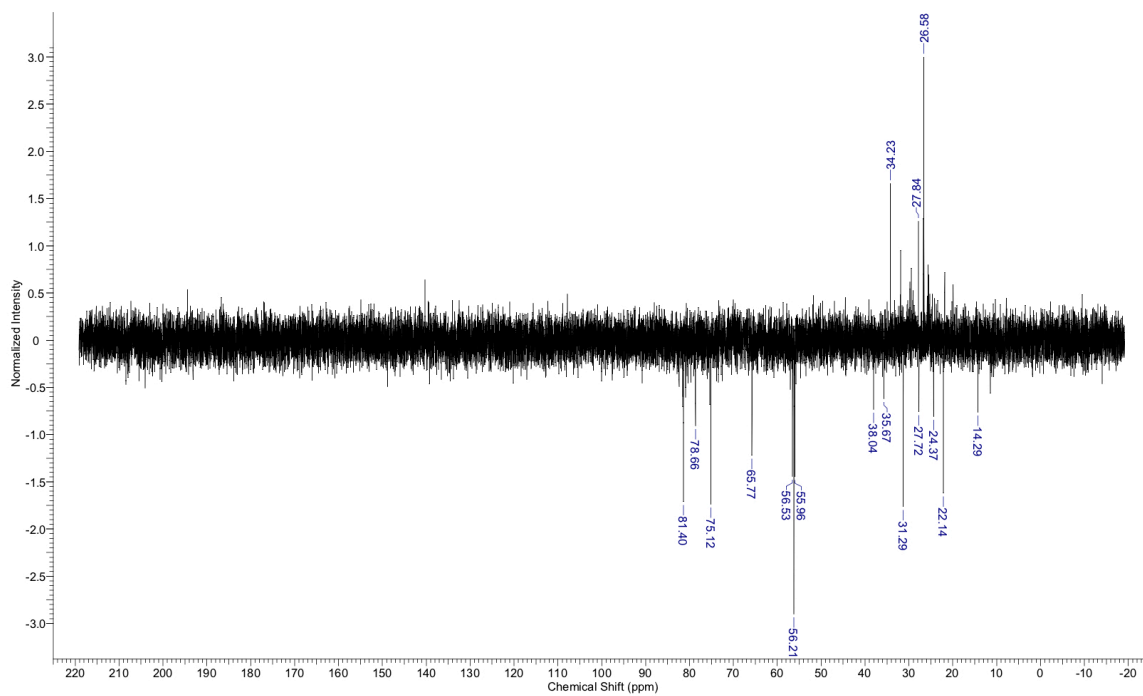

**Figure S3.** The DEPT 135 spectrum of methylated, rectified and hydrogenated LPO mixture (HLOME) in  $\text{CDCl}_3$ .

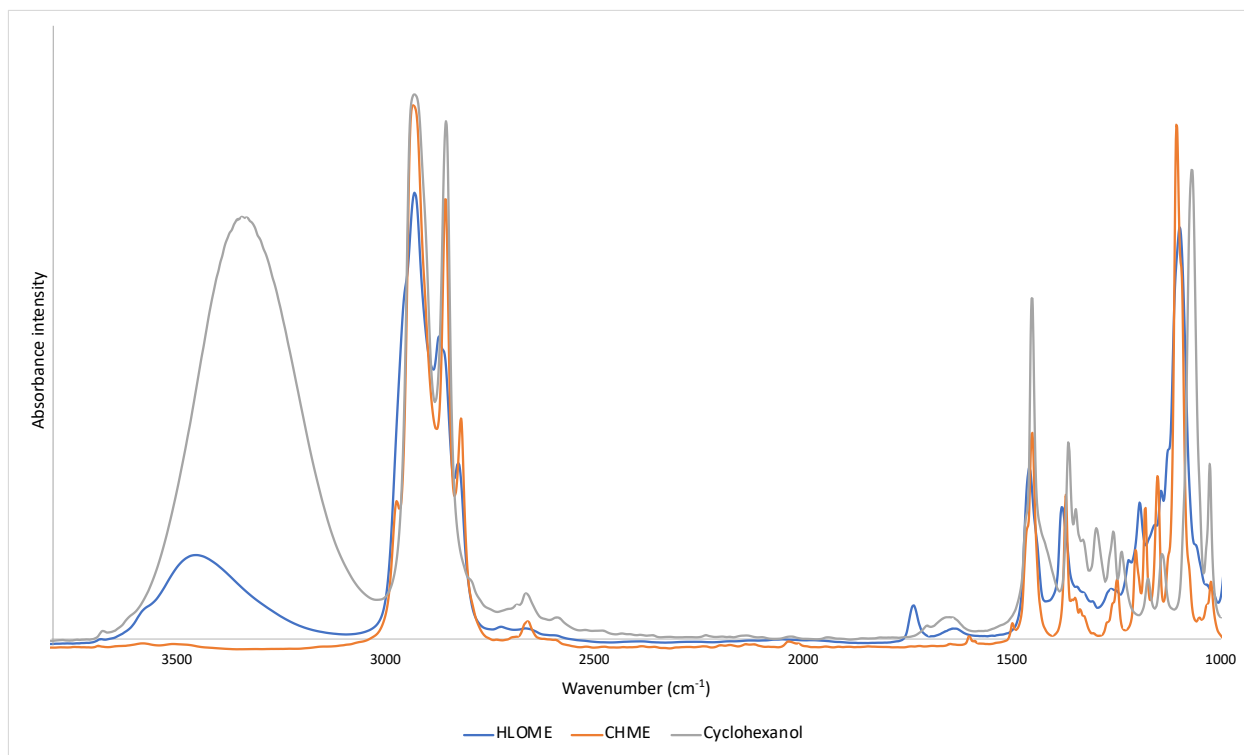

**Figure S4.** Overlaid FTIR spectra of HLOME, CHME, and cyclohexanol.
